# Supplementary material for: Methane capture at room temperature: adsorption on cubic δ-MoC and orthorhombic β-Mo2C molybdenum carbide (001) surfaces
Source: Royal Society of Chemistry journal article supplement (doi:10.1039/c4ra17225f), 2015-01-01
Supplement: c4ra17225f1.pdf [file c4ra17225f1.pdf]

*Supplementary Information*

**Methane Capture at Room Temperature: Adsorption on  $\delta$ -MoC and  $\beta$ -Mo<sub>2</sub>C Molybdenum Carbides (001) Surfaces**

Sergio Posada-Pérez,<sup>a</sup> José Roberto dos Santos Politi,<sup>b</sup> Francesc Viñes,<sup>a,\*</sup> and  
Francesc Illas<sup>a</sup>

<sup>a</sup> *Departament de Química Física & Institut de Química Teòrica i Computacional (IQTCUB),  
Universitat de Barcelona, c/ Martí i Franquès 1, 08028 Barcelona, Spain.*

<sup>b</sup> *Universidade de Brasília, Instituto de Química, Laboratório de Química Computacional, CP  
04478, Brasília, DF, 70904-970, Brazil.*

\*Corresponding author: [francesc.vines@ub.edu](mailto:francesc.vines@ub.edu)

**Table S1:** Adsorption structural data and energy values for methane molecule adsorbed on  $\beta$ -Mo<sub>2</sub>C(001) surfaces. IS and FS stand for initial and final structures, respectively, energies are in eV, distances in Å, and charges in number of electrons.

| IS                    | FS           | E <sub>ads</sub> | E <sub>ads+vdW</sub> | %vdW | $\Delta C-H_s$ | $\Delta C-H_f$ | $\Delta Q (C)$ | $\Delta Q(H_s)$ | $\Delta Q(H)$ |
|-----------------------|--------------|------------------|----------------------|------|----------------|----------------|----------------|-----------------|---------------|
| $\beta(C)-H_3(hC)$    | $H_3(hC)$    | -0.05            | -0.29                | 82.8 | 0.006          | 0.005          | -0.06          | 0.00            | 0.00          |
|                       |              |                  |                      |      | 0.006          |                |                | -0.03           |               |
|                       |              |                  |                      |      | 0.005          |                |                | 0.09            |               |
| $\beta(C)-H_1(hC)$    | $H_1(hC)$    | -0.04            | -0.24                | 83.3 | 0.014          | 0.002          | -0.04          | 0.07            | -0.01         |
|                       |              |                  |                      |      | 0.003          | 0.002          |                | -0.01           |               |
|                       |              |                  |                      |      | 0.002          | 0.00           |                |                 |               |
| $\beta(C)-H_2(hC)$    | $H_2(hC)$    | -0.05            | -0.29                | 82.8 | 0.002          | 0.002          | -0.27          | 0.06            | 0.06          |
|                       |              |                  |                      |      | 0.002          | 0.002          |                | 0.08            | 0.08          |
|                       |              |                  |                      |      | 0.002          | 0.002          |                | 0.08            | 0.08          |
| $\beta(Mo)-H_2(hC^2)$ | $H_2(tMo)$   | -0.11            | -0.39                | 71.8 | 0.027          | 0.002          | -0.10          | 0.09            | -0.01         |
|                       |              |                  |                      |      | 0.029          | 0.001          |                | 0.05            | 0.04          |
|                       |              |                  |                      |      | 0.029          | 0.001          |                | 0.05            | 0.04          |
| $\beta(Mo)-H_3(tMo)$  | $H_2(tMo)^a$ | -0.03            | -0.39                | 92.3 | 0.027          | 0.002          | -0.10          | 0.09            | -0.01         |
|                       |              |                  |                      |      | 0.029          | 0.001          |                | 0.05            | 0.04          |
|                       |              |                  |                      |      | 0.029          | 0.001          |                | 0.05            | 0.04          |
| $\beta(Mo)-H_1(hMo)$  | $H_2(tMo)^a$ | -0.03            | -0.39                | 92.3 | 0.027          | 0.002          | -0.10          | 0.08            | -0.01         |
|                       |              |                  |                      |      | 0.029          | 0.001          |                | 0.05            | 0.03          |
|                       |              |                  |                      |      | 0.029          | 0.001          |                | 0.05            | 0.03          |

<sup>a</sup>These geometries are obtained only when vdW correction is included.

**Table S2:** Adsorption data and energy values for methane adsorption on  $\delta$ -MoC(001) surfaces. IS and FS stand for initial and final structures, respectively, energies are in eV, distances in Å, and charges in number of electrons.

| IS                             | FS                             | $E_{\text{ads}}$ | $E_{\text{ads}+\text{vdW}}$ | %vdW | $\Delta C-H_s$ | $\Delta C-H_f$ | $\Delta Q$ (C) | $\Delta Q$ ( $H_s$ ) | $\Delta Q$ (H) |
|--------------------------------|--------------------------------|------------------|-----------------------------|------|----------------|----------------|----------------|----------------------|----------------|
| $\delta$ -H <sub>3</sub> (h)   | $\delta$ -H <sub>3</sub> (h)   | -0.54            | -0.92                       | 41.3 | 0.006          | 0.004          | -0.03          | 0.00                 | -0.02          |
|                                |                                |                  |                             |      | 0.003          |                |                | 0.01                 |                |
|                                |                                |                  |                             |      | 0.003          |                |                | 0.03                 |                |
| $\delta$ -H <sub>3</sub> (tC)  | $\delta$ -H <sub>3</sub> (tC)  | -0.54            | -0.90                       | 40.0 | 0.004          | 0.004          | -0.02          | -0.03                | 0.01           |
|                                |                                |                  |                             |      | 0.004          |                |                | 0.00                 |                |
|                                |                                |                  |                             |      | 0.004          |                |                | 0.03                 |                |
| $\delta$ -H <sub>2</sub> (tMo) | $\delta$ -H <sub>2</sub> (tMo) | -0.54            | -0.96                       | 43.8 | 0.007          | 0.003          | 0.01           | -0.05                | -0.01          |
|                                |                                |                  |                             |      | 0.005          |                |                | 0.01                 |                |
|                                |                                |                  |                             |      | 0.005          |                |                | 0.02                 |                |
| $\delta$ -H <sub>3</sub> (tMo) | $\delta$ -H <sub>3</sub> (tMo) | -0.55            | -0.95                       | 42.1 | 0.004          | 0.004          | -0.02          | -0.02                | -0.03          |
|                                |                                |                  |                             |      | 0.005          |                |                | 0.01                 |                |
|                                |                                |                  |                             |      | 0.004          |                |                | 0.05                 |                |
